# Supplementary material for: Bifunctional Magnetite–Gold Nanoparticles for Magneto-Mechanical Actuation and Cancer Cell Destruction
Source: MDPI journal article supplement (doi:10.3390/magnetochemistry8120185), 2022-12-12
Supplement: s1 [file Magnetochemistry-SI-GaganinaAS_et_al.pdf › GaraninaAS_et_al_Magnetochemistry-SI/Magnetochemistry-SI-GaganinaAS_et_al.pdf]

# Bifunctional Magnetite-Gold Nanoparticles for Magneto-Mechanical Actuation and Cancer Cell Destruction

Anastasiia S. Garanina<sup>1,\*,#</sup>, Maria V. Efremova<sup>1,2,3,#</sup>, Alexey E. Machulkin<sup>3,4</sup>, Evgeny V. Lyubin<sup>5</sup>, Natalia S. Vorobyeva<sup>1</sup>, Oxana A. Zhironkina<sup>6</sup>, Olga S. Strelkova<sup>6</sup>, Igor I. Kireev<sup>6</sup>, Irina B. Alieva<sup>6</sup>, Rustem E. Uzbekov<sup>7,8</sup>, Viatcheslav N. Agafonov<sup>9</sup>, Igor V. Shchetinin<sup>1</sup>, Andrey A. Fedyanin<sup>5</sup>, Alexander S. Erofeev<sup>1,3</sup>, Peter V. Gorelkin<sup>10</sup>, Yuri E. Korchev<sup>1,11</sup>, Alexander G. Savchenko<sup>1</sup> and Maxim A. Abakumov<sup>1,12</sup>

<sup>1</sup> National University of Science and Technology «MISiS», Moscow 119049, Russia

<sup>2</sup> Department of Applied Physics and Science Education, Eindhoven University of Technology, 5600MB Eindhoven, The Netherlands

<sup>3</sup> Department of Chemistry, Lomonosov Moscow State University, Moscow 119991, Russia

<sup>4</sup> Biochemistry department, RUDN University, Moscow 117198, Russia

<sup>5</sup> Department of Physics, Lomonosov Moscow State University, Moscow 119991, Russia

<sup>6</sup> Belozersky Institute of Physico-Chemical Biology, Lomonosov Moscow State University, Moscow 119992, Russia

<sup>7</sup> Faculté de Médecine, Université François Rabelais, 37000 Tours, France

<sup>8</sup> Department of Bioengineering and Bioinformatics, Lomonosov Moscow State University, Moscow 119234, Russia

<sup>9</sup> GREMAN, UMR CNRS 7347, Université François Rabelais, 37200 Tours, France

<sup>10</sup> Medical Nanotechnology LLC, Skolkovo Innovation Center, Moscow 121205, Russia

<sup>11</sup> Faculty of Medicine, Imperial College London, London SW7 2AZ, UK

<sup>12</sup> Department of Medical Nanobiotechnology, Russian National Research Medical University, Moscow 117997, Russia

\* Correspondence: anastasiacit@gmail.com

† These authors contributed equally to this work.

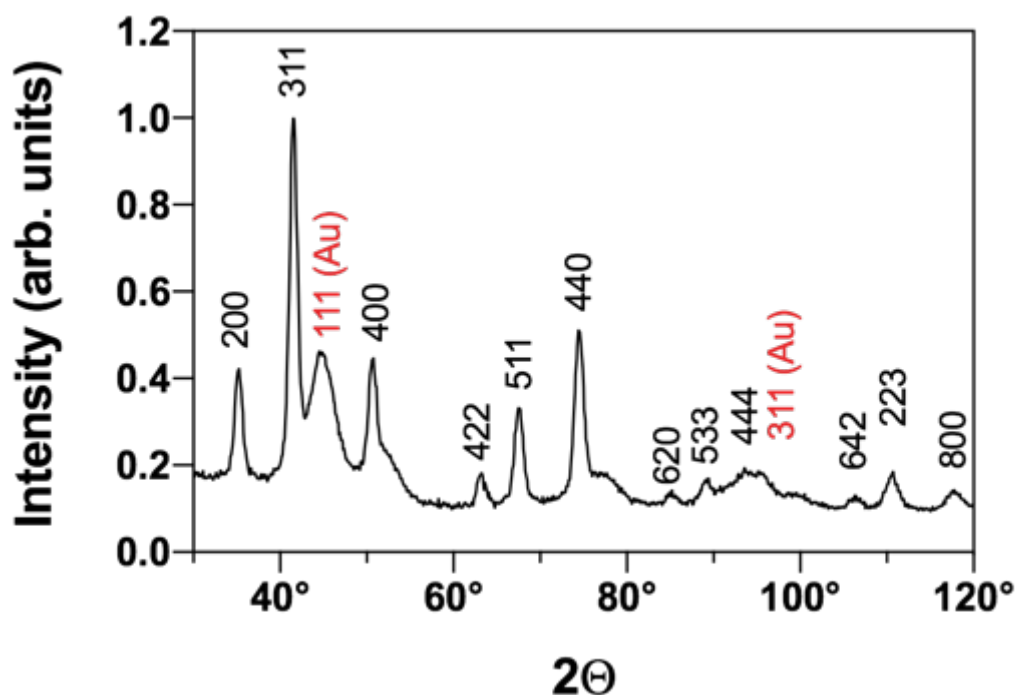

**Figure S1.** Experimental X-Ray diffraction pattern of Fe<sub>3</sub>O<sub>4</sub>-Au MNPs. Black and red Miller indices correspond to Fe<sub>3</sub>O<sub>4</sub> and Au phases, respectively. The intensity is normalized to the strongest peak, i.e. the Fe<sub>3</sub>O<sub>4</sub> (311).

**Table S1.** Results of the MNPs' structural characterization by XRD. The volume fraction of Fe<sub>3</sub>O<sub>4</sub> and Au, crystallite size and lattice parameter (a) are listed.

| Volume fraction, %             |     | Crystallite diameter, nm       |     | Lattice parameter, nm          |        |
|--------------------------------|-----|--------------------------------|-----|--------------------------------|--------|
| Fe <sub>3</sub> O <sub>4</sub> | Au  | Fe <sub>3</sub> O <sub>4</sub> | Au  | Fe <sub>3</sub> O <sub>4</sub> | Au     |
| 96.0                           | 4.0 | 12.0                           | 3.0 | 0.8363                         | 0.4055 |

For detailed investigation of MNP-Cy5 localization relative to the cells 2 h after their co-incubation we stained LNCaP and PC-3 cells with anti- $\beta$ -catenin antibodies and made Z-stack images of these cells (Figure S2). Orthogonal views demonstrated that MNP-Cy5 conglomerates interacted with cells in two ways – NPs located inside the cell, predominantly in the perinuclear area (Figure S2a, S2c), or contacted with cell plasma membrane (Figure S2b, S2d). Probably, in the latter case, such MNP-Cy5 position preceded their internalization by cells.

MNPs-Cy5,  $\beta$ -catenin, DAPI

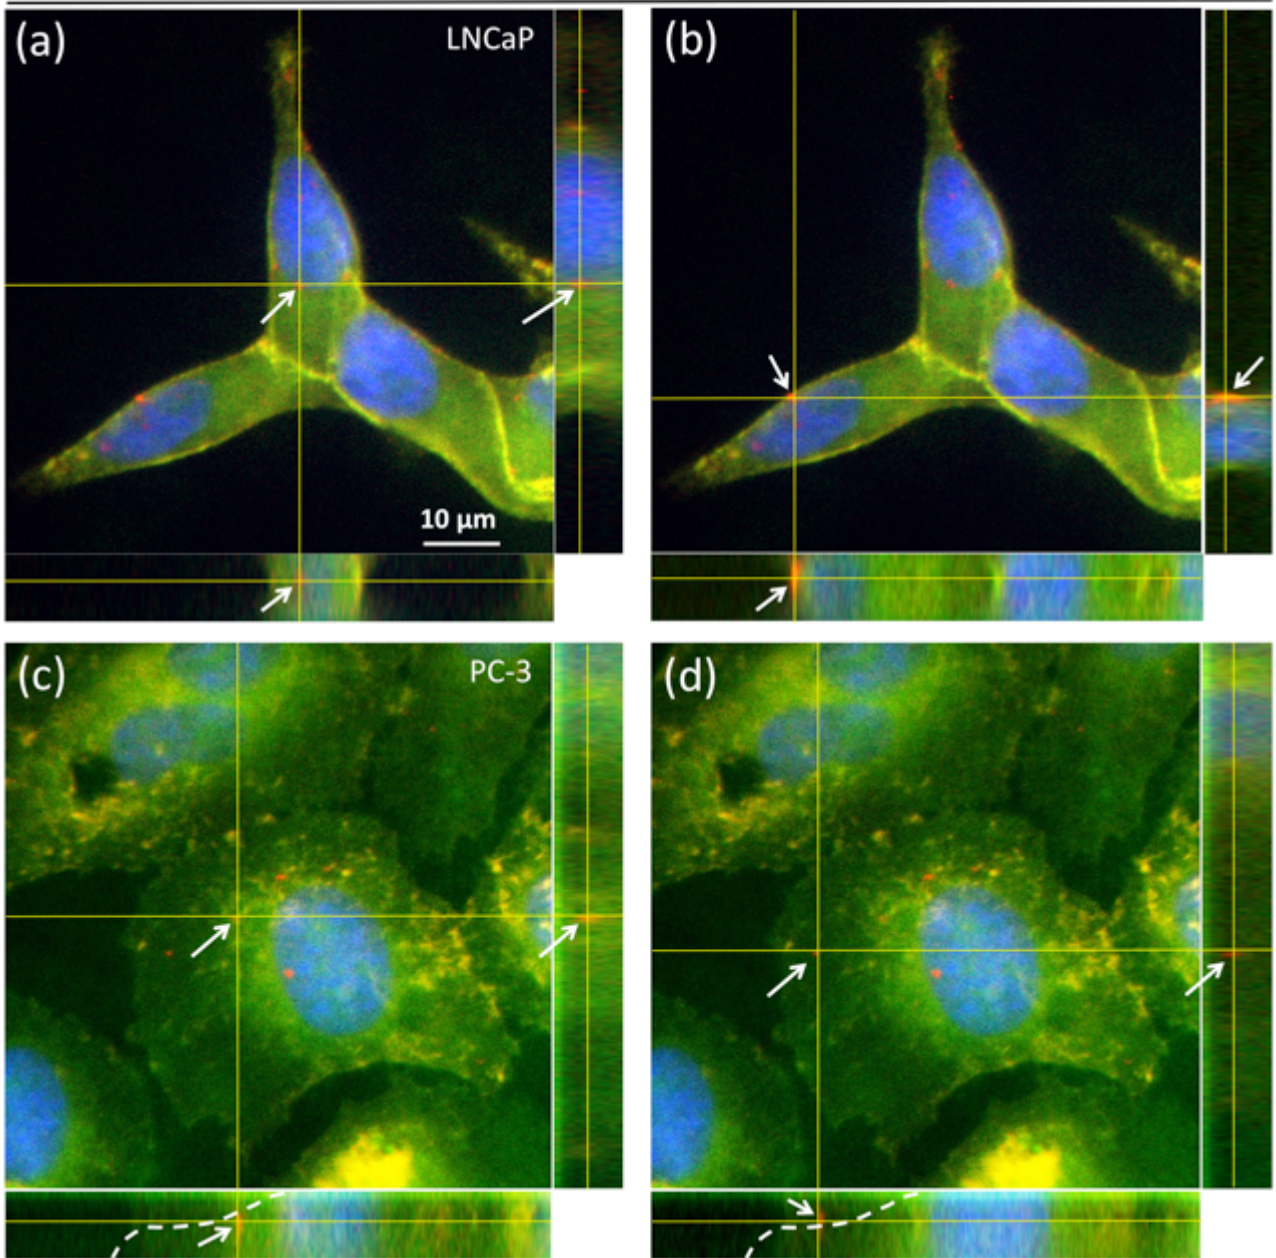

**Figure S2.** XY-, XZ- and YZ-projections of LNCaP (a,b) and PC-3 (c,d) cells Z-stacks (8 steps, 500 nm each) after 2 h of co-incubation with MNPs-Cy5 ( $30 \mu\text{g mL}^{-1} \text{Fe}_3\text{O}_4$ ,  $5 \mu\text{g mL}^{-1} \text{Au}$ ,  $1 \mu\text{g mL}^{-1} \text{Cy5}$ ). (a,c) Intracellular localization of NPs; (b,d) Extracellular localization of NPs on the cell plasma membrane. White arrows indicate MNPs-Cy5 of the interest in three orthogonal projections. Dashed lines indicate cell profiles. Fluorescent staining of cells with anti- $\beta$ -catenin antibodies and DAPI. Laser scanning confocal microscope Nikon C2.

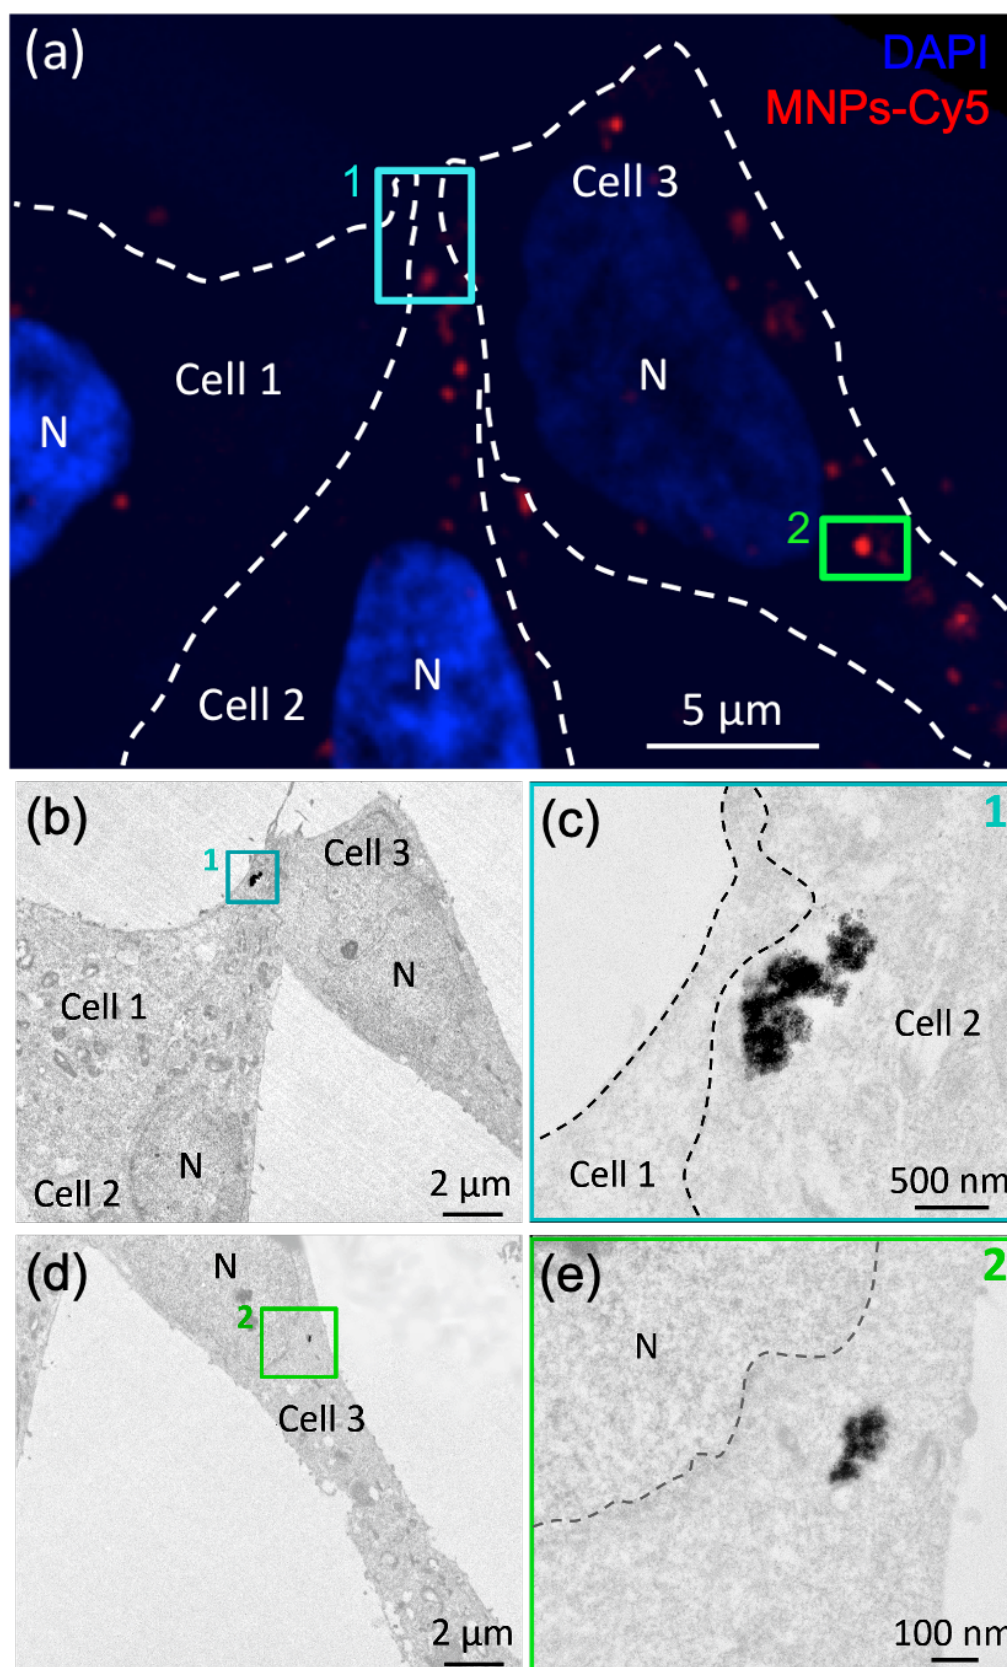

**Figure S3.** Correlative light-electron microscopy of LNCaP cells co-incubated with MNPs-Cy5 ( $30 \mu\text{g mL}^{-1} \text{Fe}_3\text{O}_4$ ,  $5 \mu\text{g mL}^{-1} \text{Au}$ ,  $1 \mu\text{g mL}^{-1} \text{Cy5}$ ) for 2 h. (a) Laser scanning confocal microscopy of three cells with MNPs-Cy5 inside (fluorescent staining of cells with DAPI); (b-e) TEM of the same cells. Blue (1) and green (2) rectangles highlight areas of interest with MNPs-Cy5 inside the cells. Panels (c,e) are the magnified views of the areas indicated in panels (b,d), respectively. Dashed lines on panels (a,c) indicate cell profiles, on panel (e) – nucleus profile. N – nucleus.



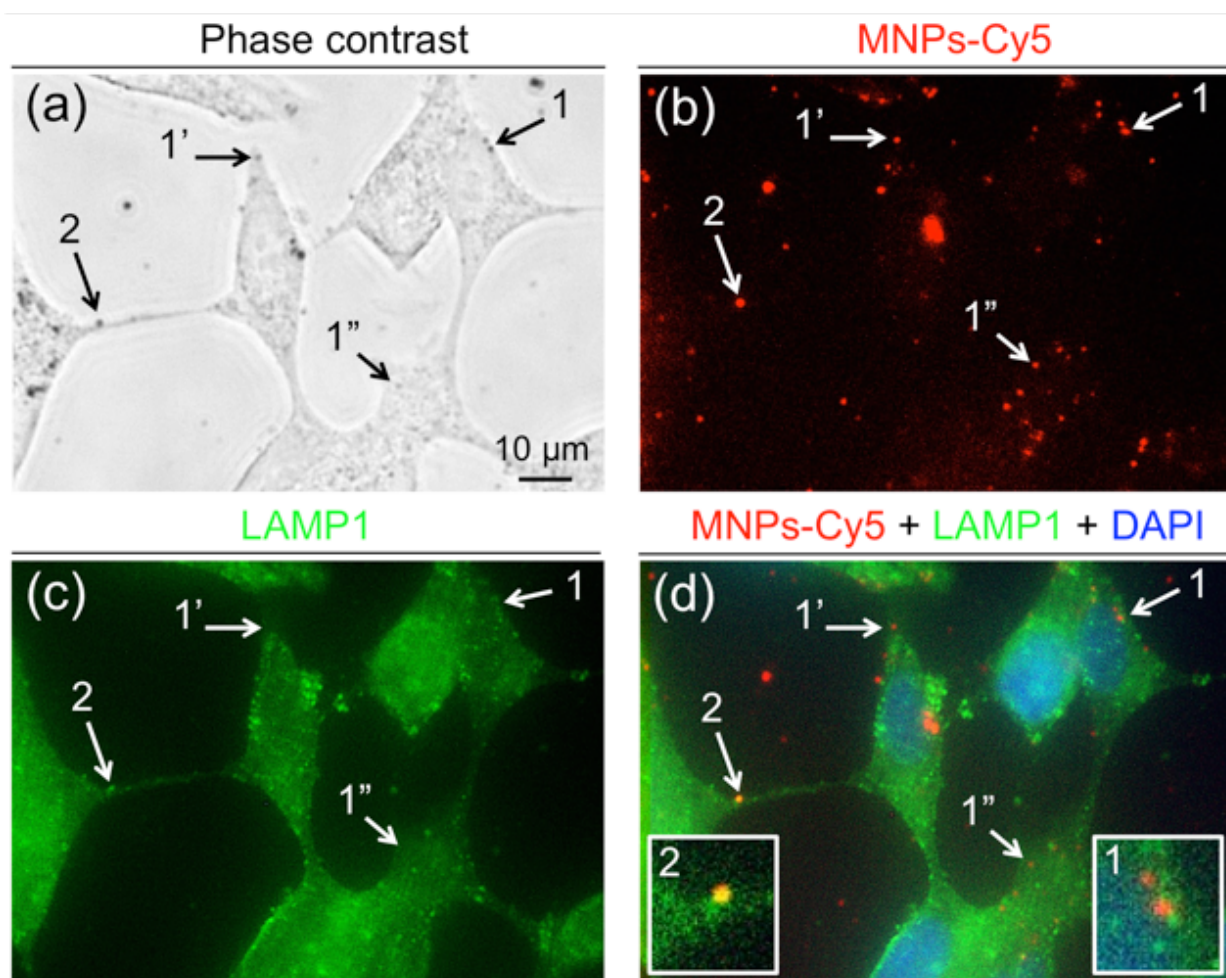

**Figure S4.** MNP-Cy5 localization inside LNCaP cells after 2 h of co-incubation (30  $\mu\text{g mL}^{-1}$   $\text{Fe}_3\text{O}_4$ , 5  $\mu\text{g mL}^{-1}$  Au, 1  $\mu\text{g mL}^{-1}$  Cy5). Arrows with indices 1, 1', and 1'' point to examples of MNPs-Cy5 located not in acid vesicular compartment of the cells. Arrows with index 2 point to an example of MNPs-Cy5 located in lysosome. White rectangles with indices 1 and 2 on the panel (d) highlight the magnified views of areas, which are indicated by arrows with corresponding indices. Fluorescent staining of cells with anti-LAMP1 antibodies and DAPI. Fluorescent microscope EVOS.

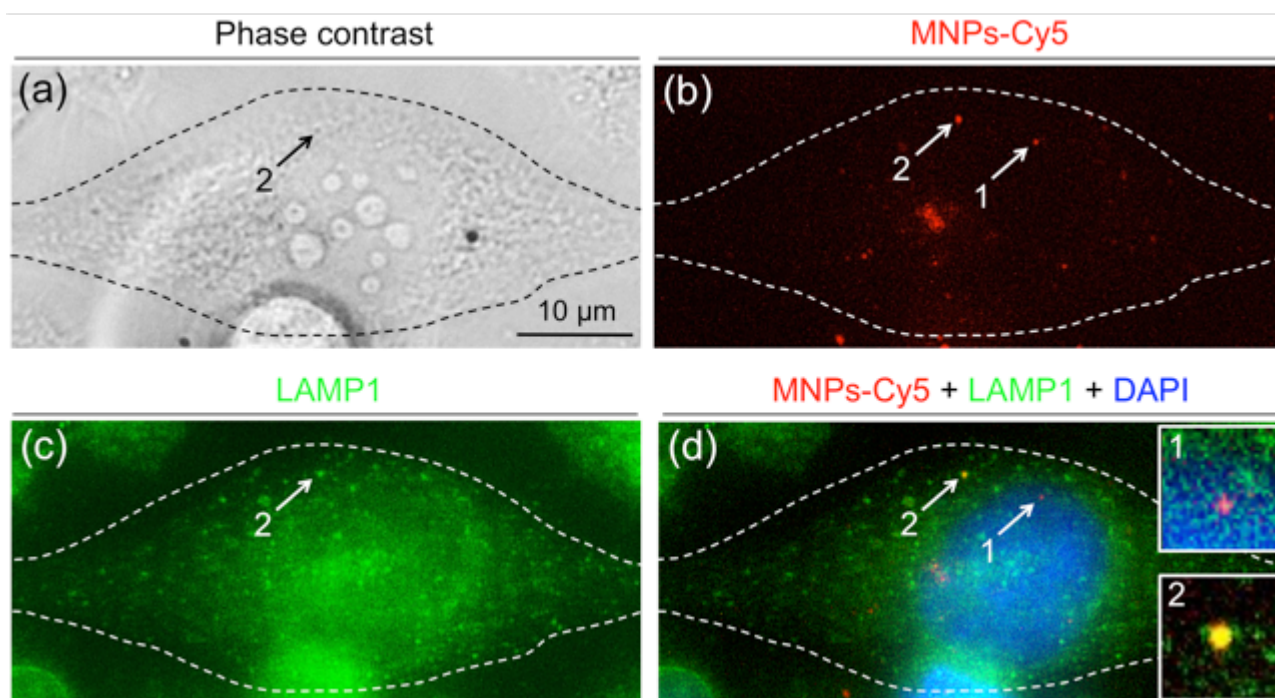

**Figure S5.** MNP-Cy5 localization inside PC-3 cells after 2 h of co-incubation ( $30 \mu\text{g mL}^{-1} \text{Fe}_3\text{O}_4$ ,  $5 \mu\text{g mL}^{-1} \text{Au}$ ,  $1 \mu\text{g mL}^{-1} \text{Cy5}$ ). Arrows with index 1 point to an example of MNPs-Cy5 located not in acid vesicular compartment of the cell. Arrows with index 2 point to an example of MNPs-Cy5 located in lysosome. White rectangles with indices 1 and 2 on the panel (d) highlight the magnified views of areas, which are indicated by arrows with corresponding indices. Dashed lines indicate cell profiles. Fluorescent staining of cells with anti-LAMP1 antibodies and DAPI. Fluorescent microscope EVOS.

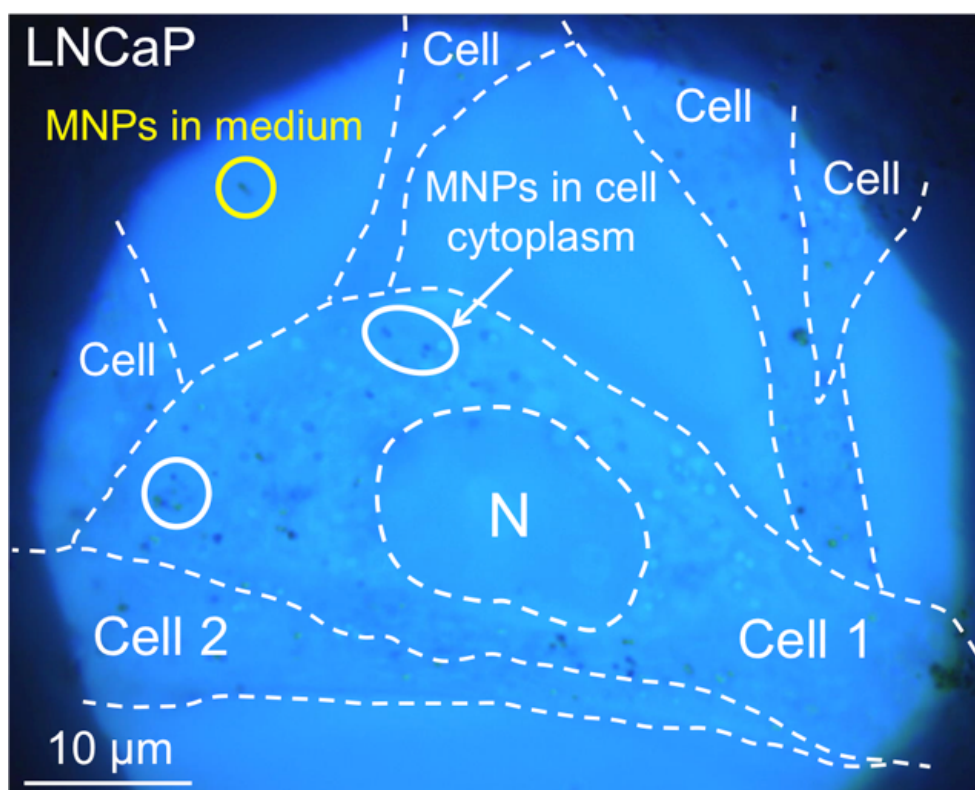

**Figure S6.** Micrograph of LNCaP cells after 24 h of co-incubation with MNPs-Cy5 ( $30 \mu\text{g mL}^{-1} \text{Fe}_3\text{O}_4$ ,  $5 \mu\text{g mL}^{-1} \text{Au}$ ,  $1 \mu\text{g mL}^{-1} \text{Cy5}$ ) and subsequent placement in a rotation magnetic field (1 Hz, 7 mT) in magneto-optic system. Dashed lines indicate cells and nucleus profiles. N – nucleus. Explanatory figure for Video S5, S6.

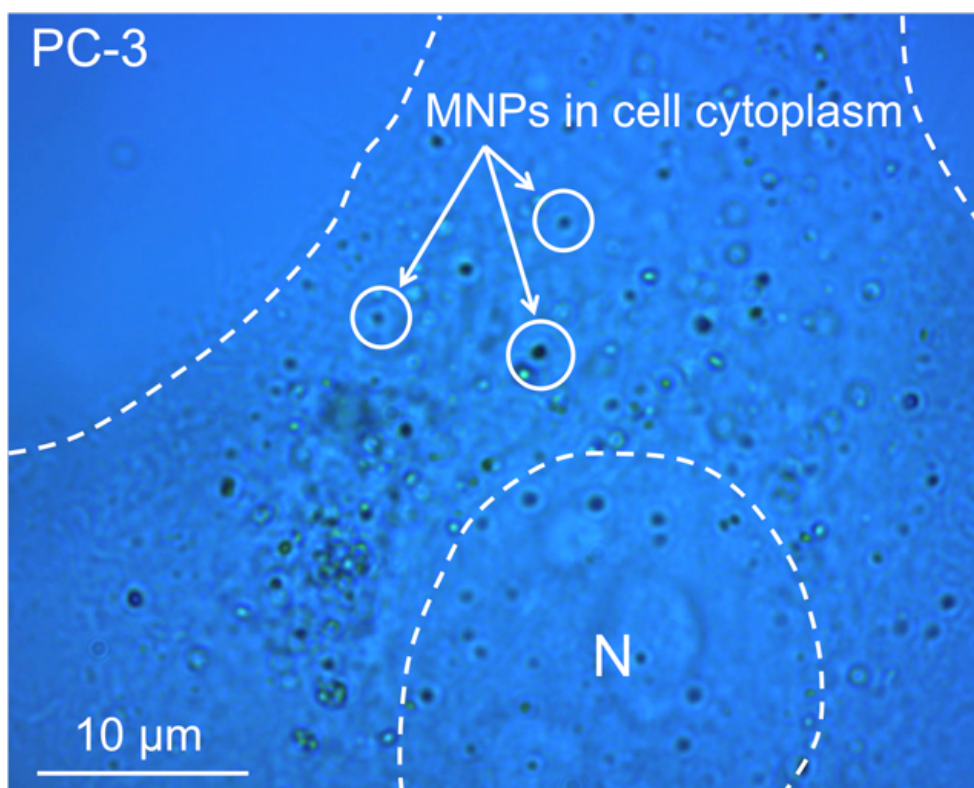

**Figure S7.** Micrograph of PC-3 cell after 24 h of co-incubation with MNPs-Cy5 ( $30 \mu\text{g mL}^{-1} \text{Fe}_3\text{O}_4$ ,  $5 \mu\text{g mL}^{-1} \text{Au}$ ,  $1 \mu\text{g mL}^{-1} \text{Cy5}$ ) and subsequent placement in a rotation magnetic field (1 Hz, 7 mT) in magneto-optic system. Dashed lines indicate cell and nucleus profiles. N – nucleus. Explanatory figure for Video S7.



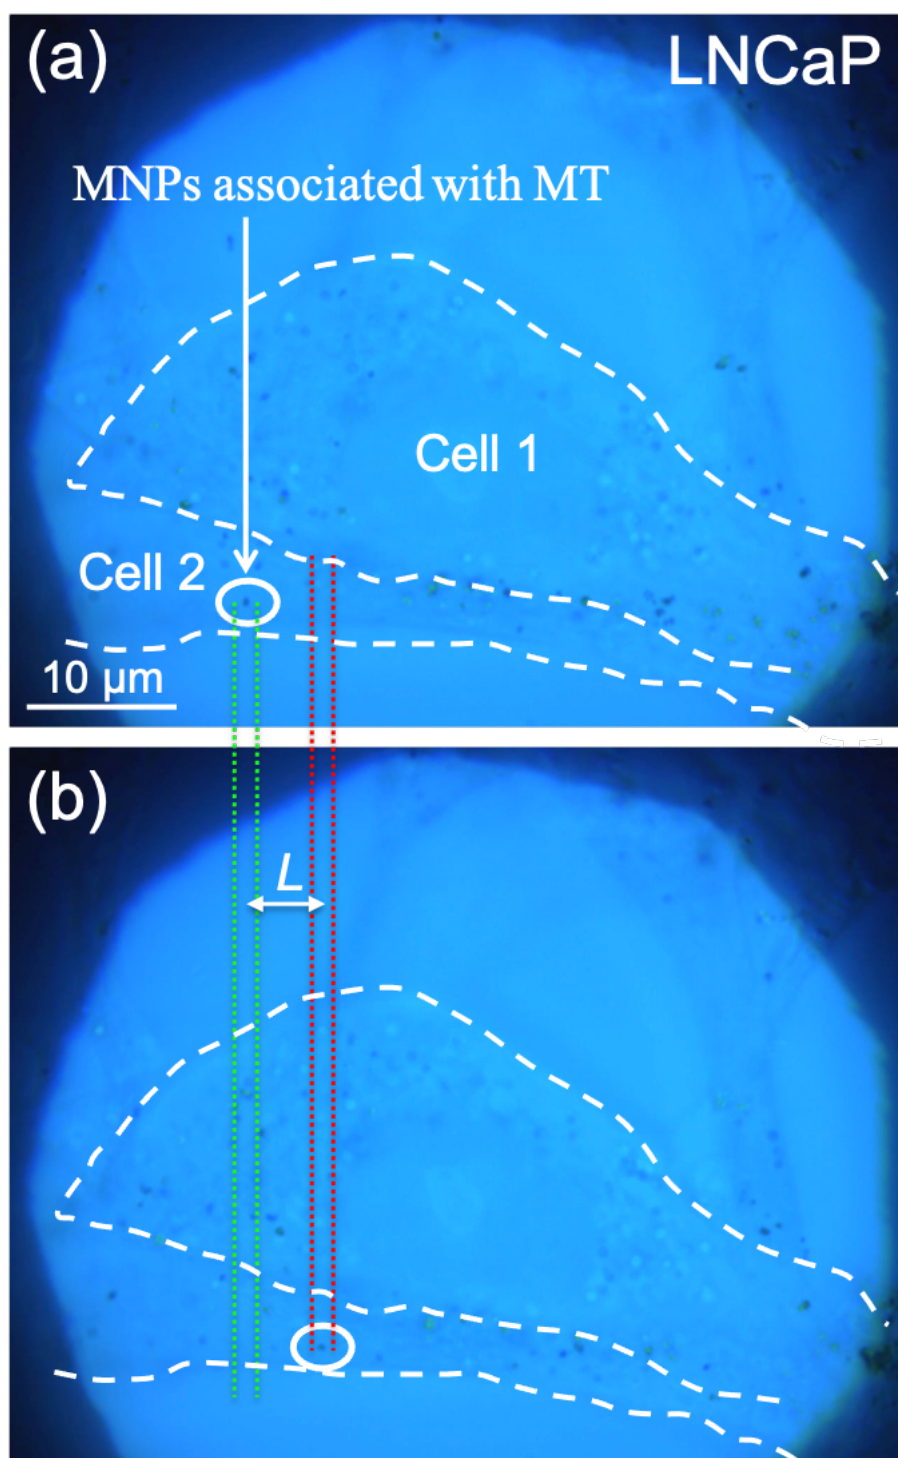

**Figure S8.** Micrographs of LNCaP cells after 24 h of co-incubation with MNPs-Cy5 ( $30 \mu\text{g mL}^{-1} \text{Fe}_3\text{O}_4$ ,  $5 \mu\text{g mL}^{-1} \text{Au}$ ,  $1 \mu\text{g mL}^{-1} \text{Cy5}$ ) and subsequent placement in a rotation magnetic field (1 Hz, 7 mT) in magneto-optic system. Dashed white lines indicate cells profiles, green and red lines show the localization of MNPs conglomerate at different time points. MT – microtubules, L – distance traveled by MNPs in a time between frames presented on panels (a) and (b). Explanatory figure for Video S8.



**Video S1.** Real-time observation of magnetite–gold dumbbell MNP-Cy5 behavior in water solution without magnetic field application.

**Video S2.** Real-time observation of magnetite–gold dumbbell MNP-Cy5 behavior in water solution under low-frequency rotation field (1 Hz, 7 mT).

**Video S3.** Real-time observation of magnetite–gold dumbbell MNP-Cy5 behavior in water solution under low-frequency constant field (7 mT).

**Video S4.** Real-time observation of magnetite–gold dumbbell MNP-Cy5 behavior in water solution during alternating current field exposure (1 Hz, 7 mT) and after its termination.

**Video S5.** Real-time observation of magnetite–gold dumbbell MNP-Cy5 behavior inside LNCaP cell (“Cell 1” in Figure S6) after 24 h of co-incubation and following placement in a rotation magnetic field (1 Hz, 7 mT) in magneto-optic system.

**Video S6.** Real-time observation of magnetite–gold dumbbell MNP-Cy5 behavior in medium and inside LNCaP cell (“Cell 1” in Figure S6) after 24 h of co-incubation and following placement in a rotation magnetic field (1 Hz, 7 mT) in magneto-optic system.

**Video S7.** Real-time observation of magnetite–gold dumbbell MNP-Cy5 behavior inside PC-3 cell after 24 h of co-incubation and following placement in a rotation magnetic field (1 Hz, 7 mT) in magneto-optic system.

**Video S8.** Real-time observation of magnetite–gold dumbbell MNP-Cy5 behavior inside LNCaP cell (“Cell 2” in Figure S8) after 24 h of co-incubation and following placement in a rotation magnetic field (1 Hz, 7 mT) in magneto-optic system.
